# Supplementary material for: Ultrabright Red‐Emitting Photostable Perylene Bisimide Dyes: New Indicators for Ratiometric Sensing of High pH or Carbon Dioxide
Source: PubMed Central journal article supplement — Chemistry. 2018 Jun 27;24(42):10711–20. doi: 10.1002/chem.201800867 (PMC6099519; doi:10.1002/chem.201800867), 2018-06-27
Supplement: CHEM-24-10711-s001.pdf [file CHEM-24-10711-s001.pdf]

# CHEMISTRY

## A **European** Journal

### Supporting Information

#### **Ultrabright Red-Emitting Photostable Perylene Bisimide Dyes: New Indicators for Ratiometric Sensing of High pH or Carbon Dioxide**

David Pfeifer, Ingo Klimant, and Sergey M. Borisov<sup>\*[a]</sup>

chem\_201800867\_sm\_miscellaneous\_information.pdf

# **Supporting Information**

## **Table of Contents**

|                                                |           |
|------------------------------------------------|-----------|
| <b>pH Sensing Properties.....</b>              | <b>3</b>  |
| <b>CO<sub>2</sub> Sensing Properties .....</b> | <b>7</b>  |
| <b>NMR Spectra .....</b>                       | <b>12</b> |
| <b>MALDI-TOF-MS .....</b>                      | <b>22</b> |

## pH Sensing Properties

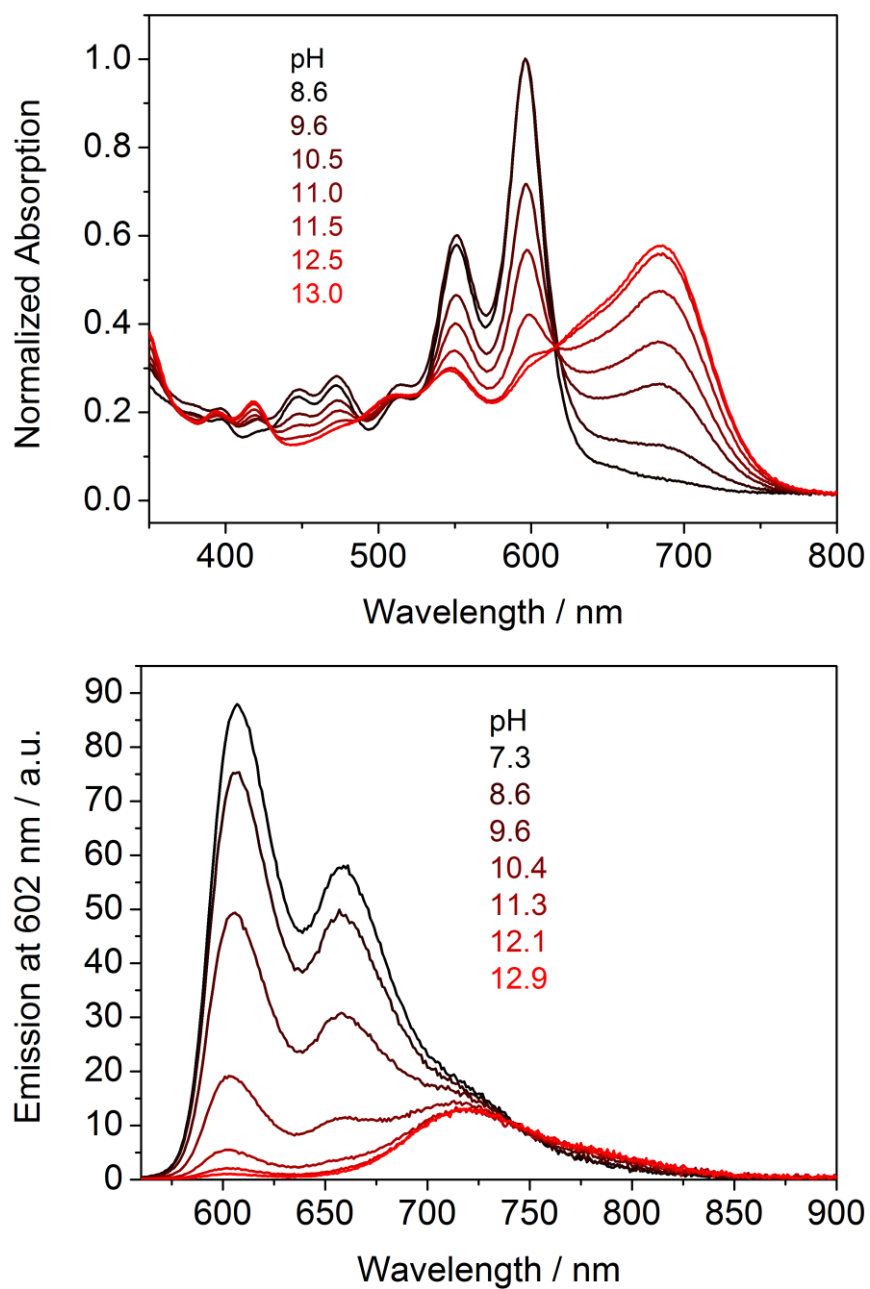

Figure S1. pH dependence of absorption and fluorescence spectra of **2b** embedded in hydrogel D4, measured at 25°C ( $\lambda_{\text{exc}}$  528 nm).

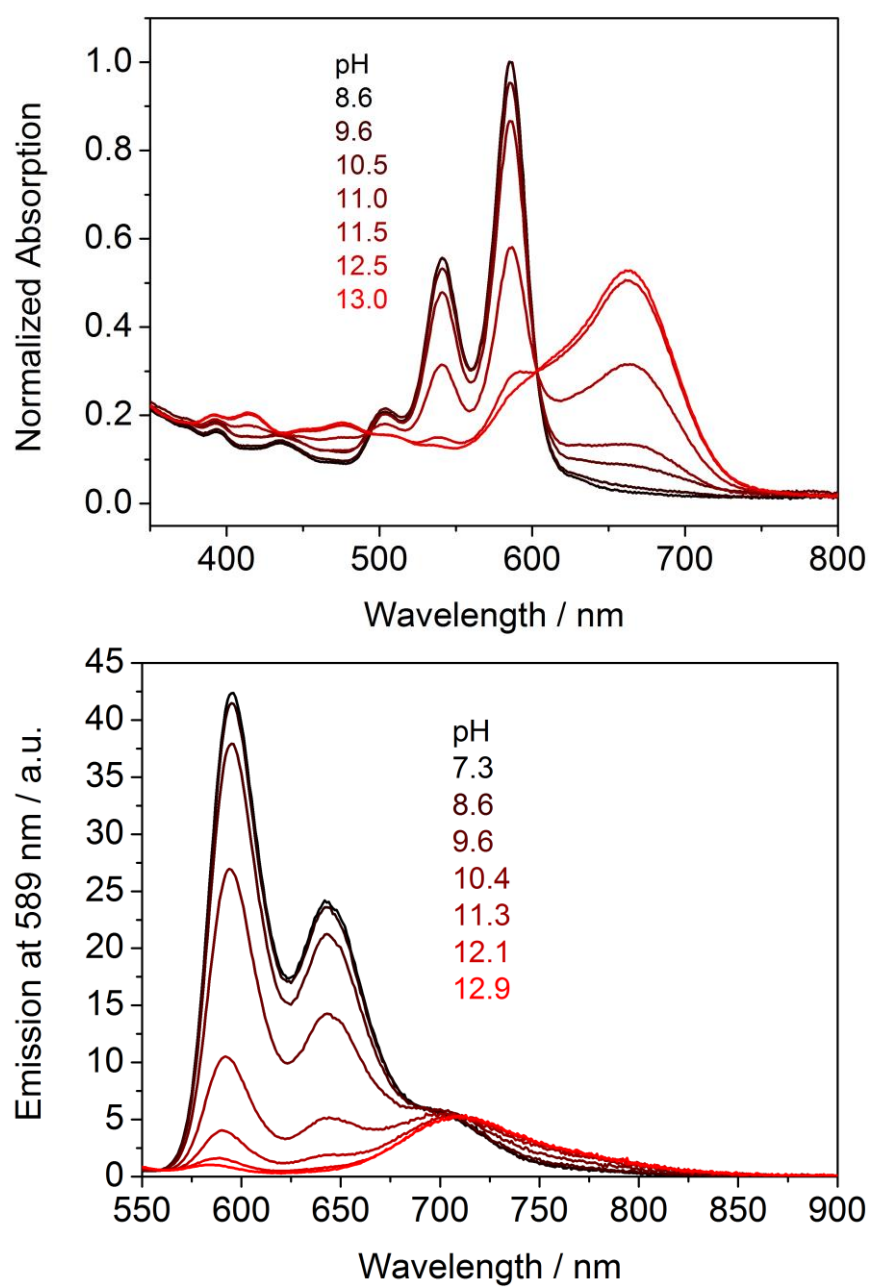

Figure S2. pH dependence of absorption and fluorescence spectra of **2c** embedded in hydrogel D4, measured at 25°C ( $\lambda_{\text{exc}}$  493 nm).

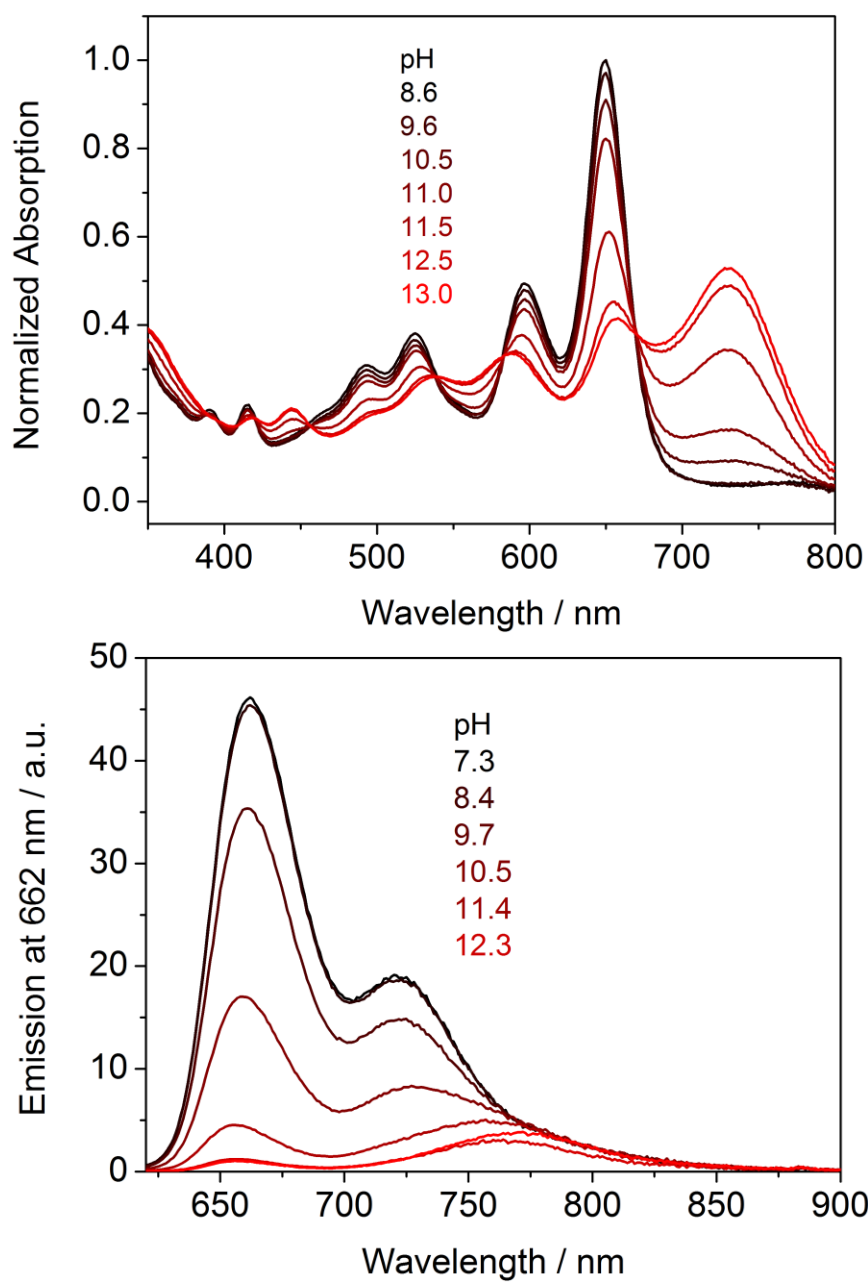

Figure S3. pH dependence of absorption and fluorescence spectra of **3a** embedded in hydrogel D4, measured at 25°C ( $\lambda_{\text{exc}}$  590 nm).

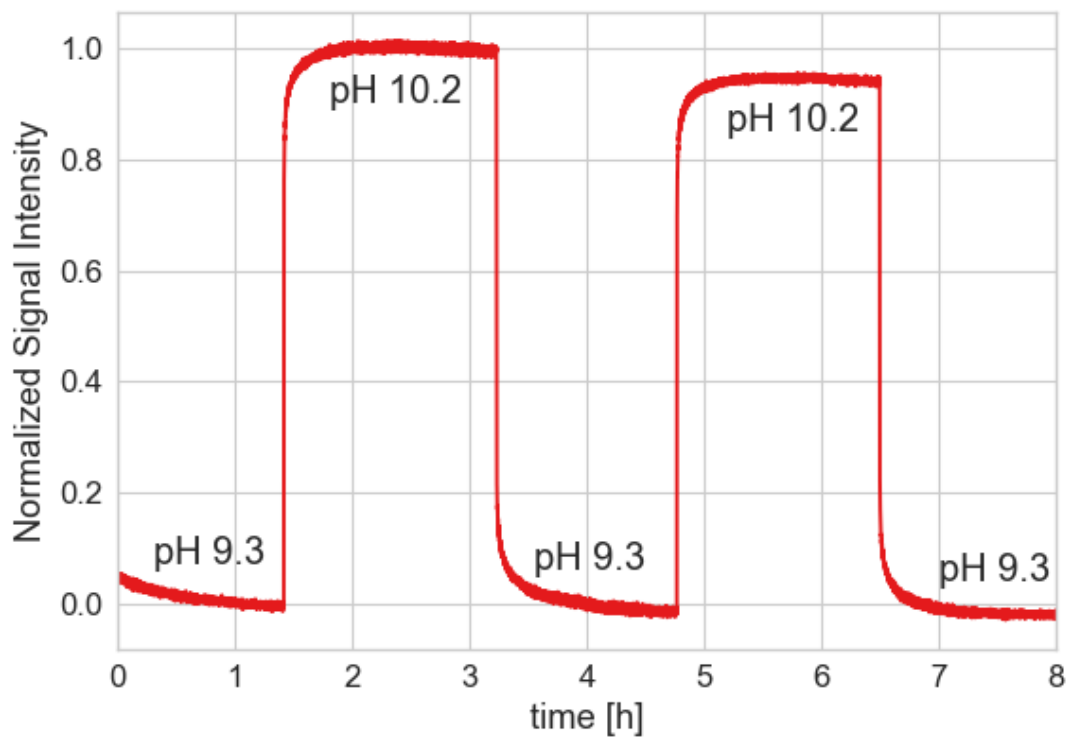

Figure S4. Reversible sensor response to dynamic pH changes measured in buffer solutions at 25°C.

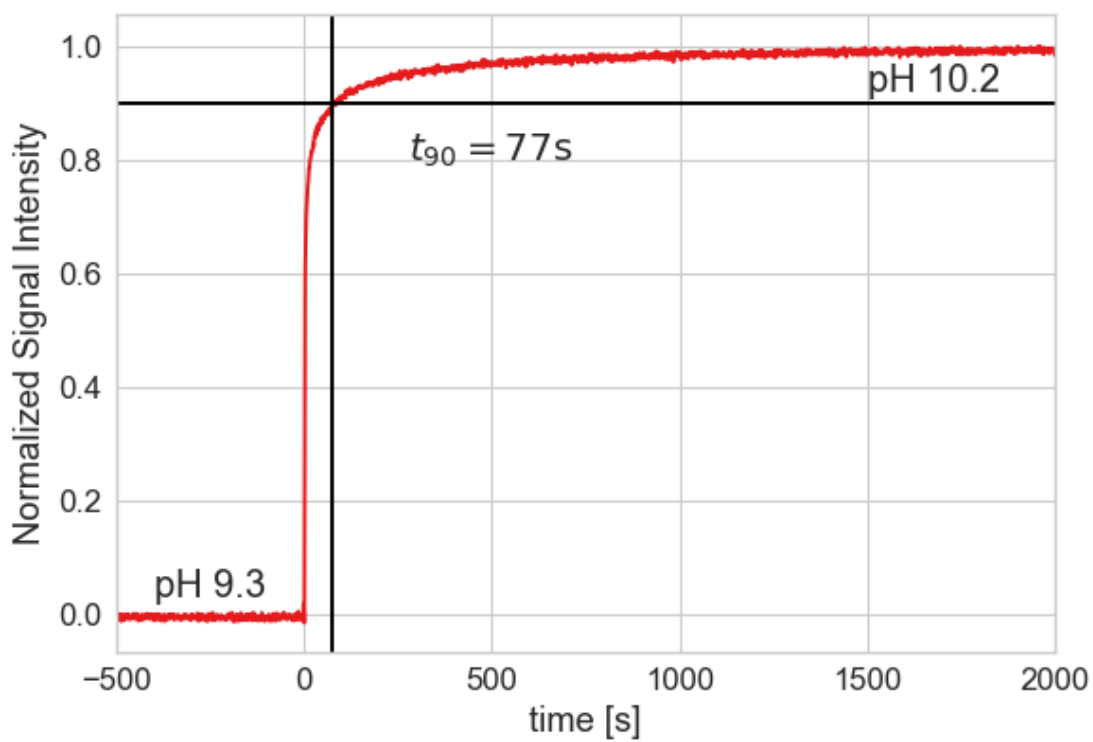

Figure S5. Measurement of  $t_{90}$  response time from pH 9.3-10.2 at 25°C.

# CO<sub>2</sub> Sensing Properties

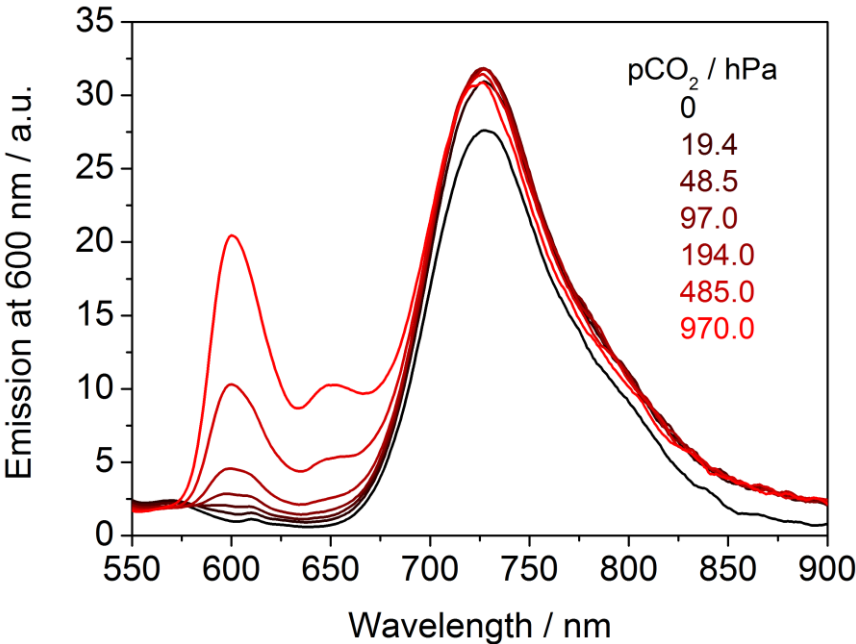

Figure S6. Fluorescence spectra of CO<sub>2</sub>\_1 sensor foil measured in water at different pCO<sub>2</sub> (25°C).

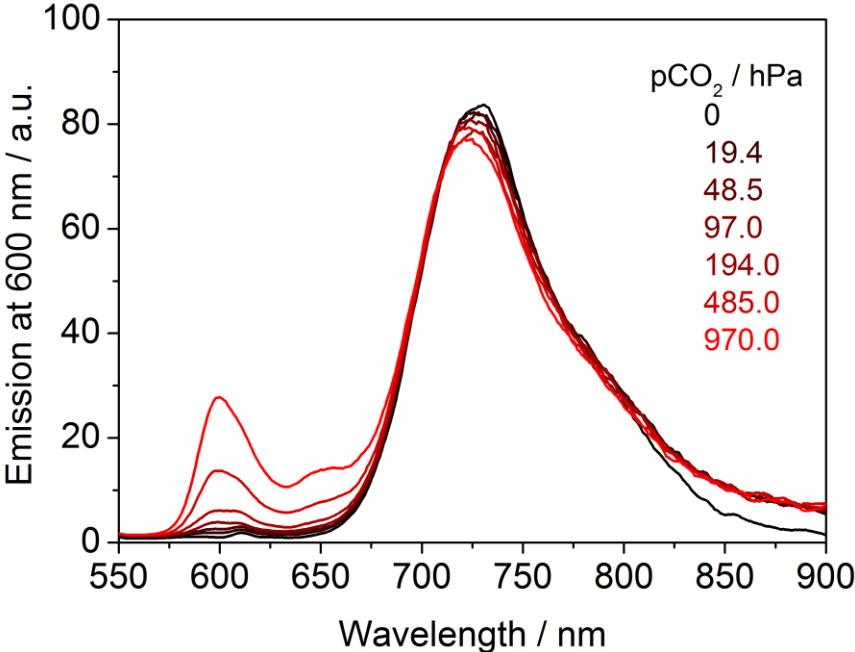

Figure S7. Fluorescence spectra of CO<sub>2</sub>\_2 sensor foil measured in water at different pCO<sub>2</sub> (25°C).



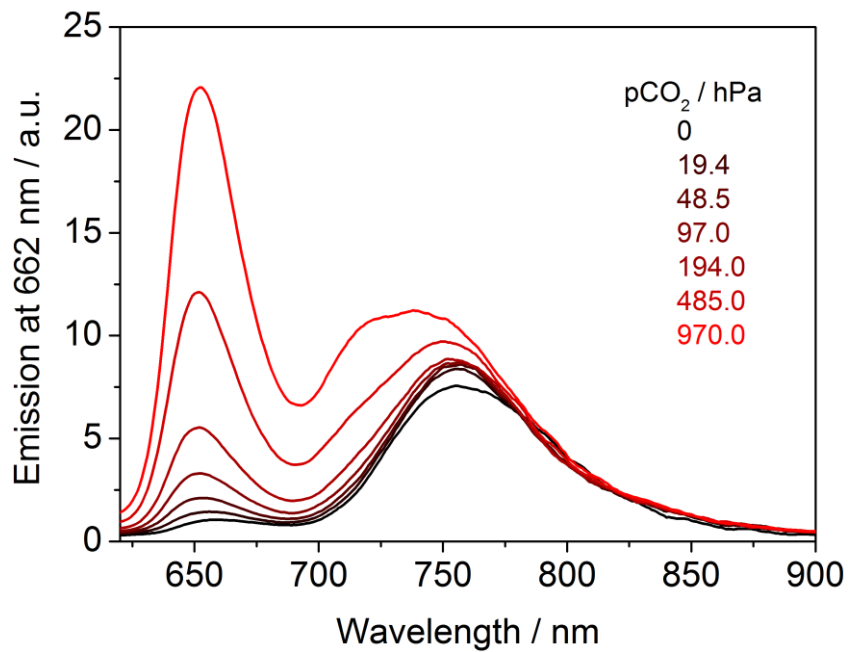

Figure S8. Fluorescence spectra of CO<sub>2</sub>\_8 sensor foil measured in water at different pCO<sub>2</sub> (25°C).

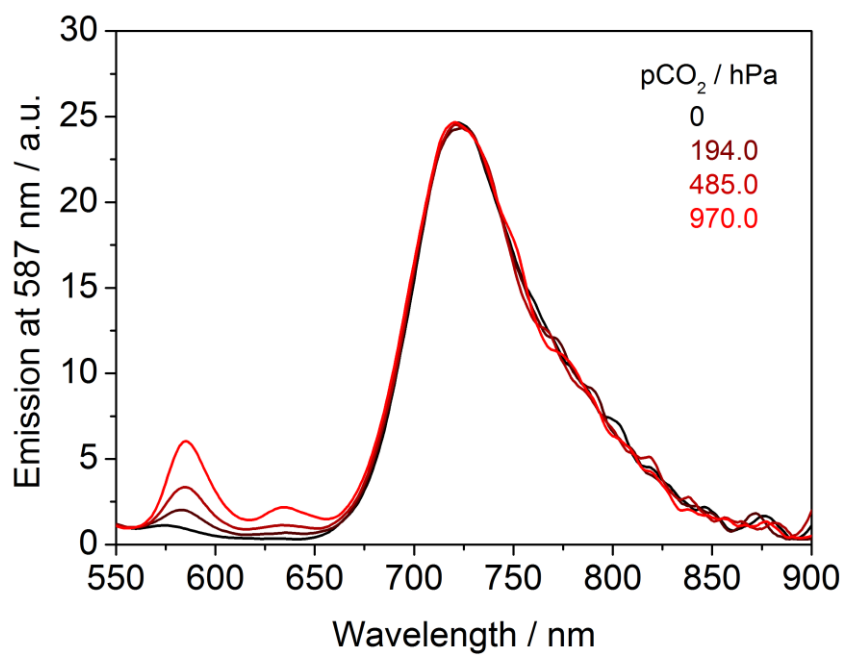

Figure S9. Fluorescence spectra of CO<sub>2</sub>\_4 sensor foil measured in water at different pCO<sub>2</sub> (25°C).

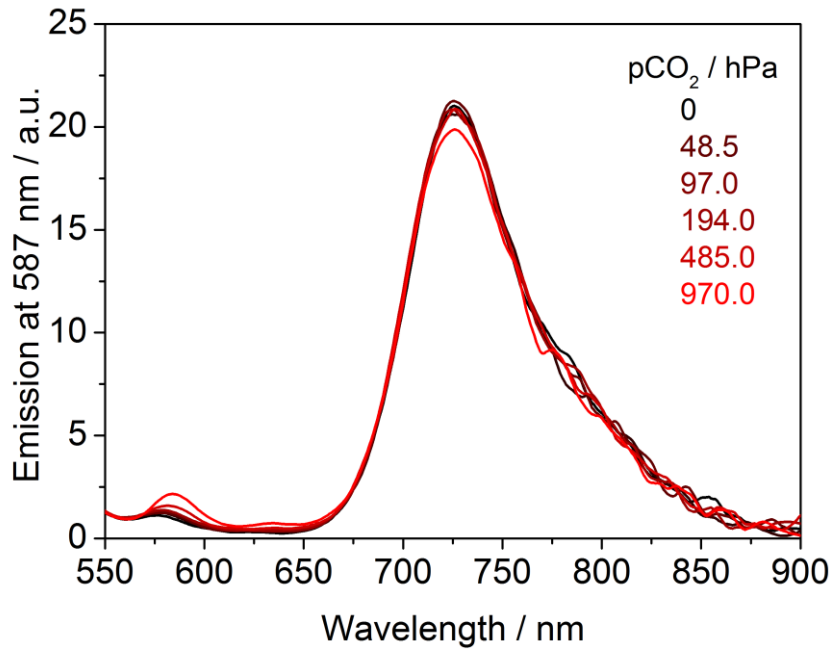

Figure S10. Fluorescence spectra of CO<sub>2</sub>\_5 sensor foil measured in water at different pCO<sub>2</sub> (25°C).

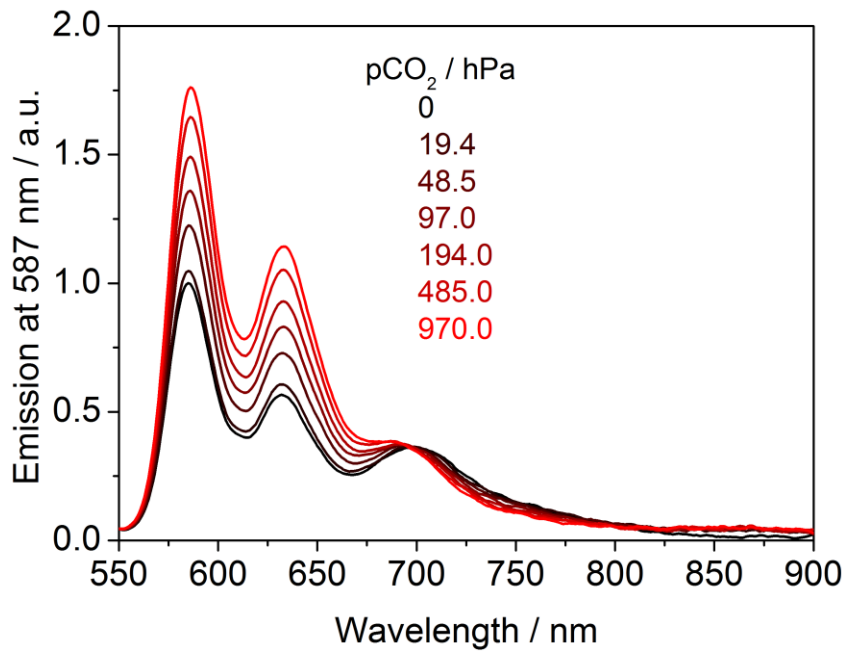

Figure S11. Fluorescence spectra of CO<sub>2</sub>\_6 sensor foil measured in water at different pCO<sub>2</sub> (25°C).

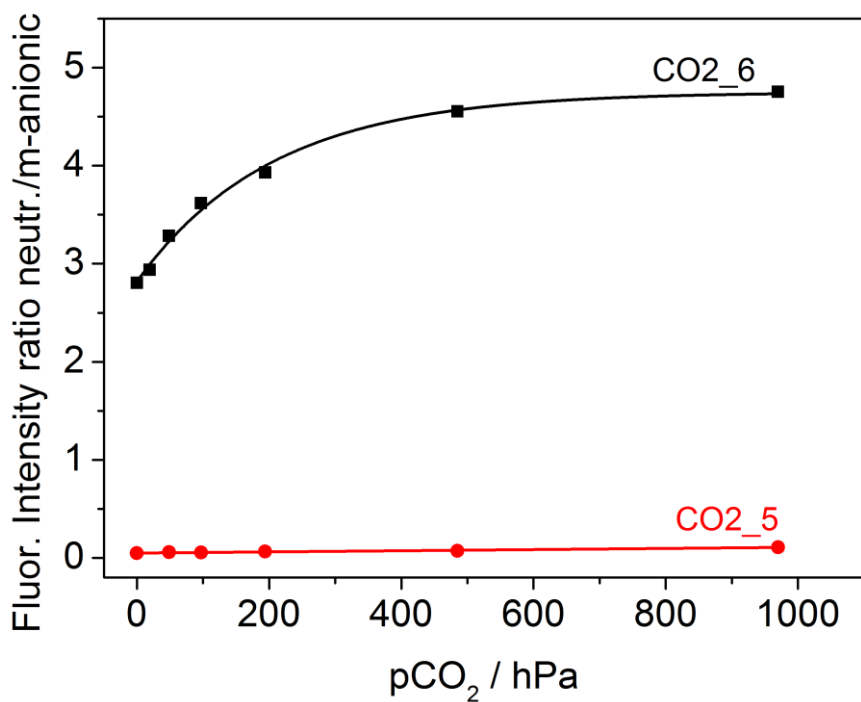

Figure S12. Corresponding calibration curves of CO2\_5 and CO2\_6.

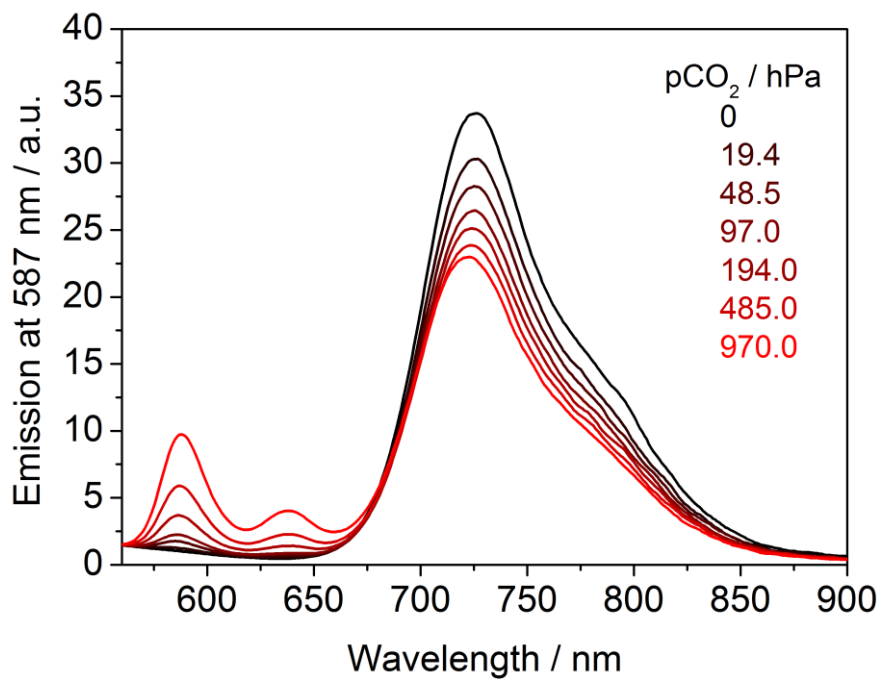

Figure S13. Fluorescence spectra of CO2\_3 sensor foil measured in gas phase at 85% relative humidity at different pCO<sub>2</sub>, regulated by bubbling CO<sub>2</sub> through saturated KCl solution (25°C).

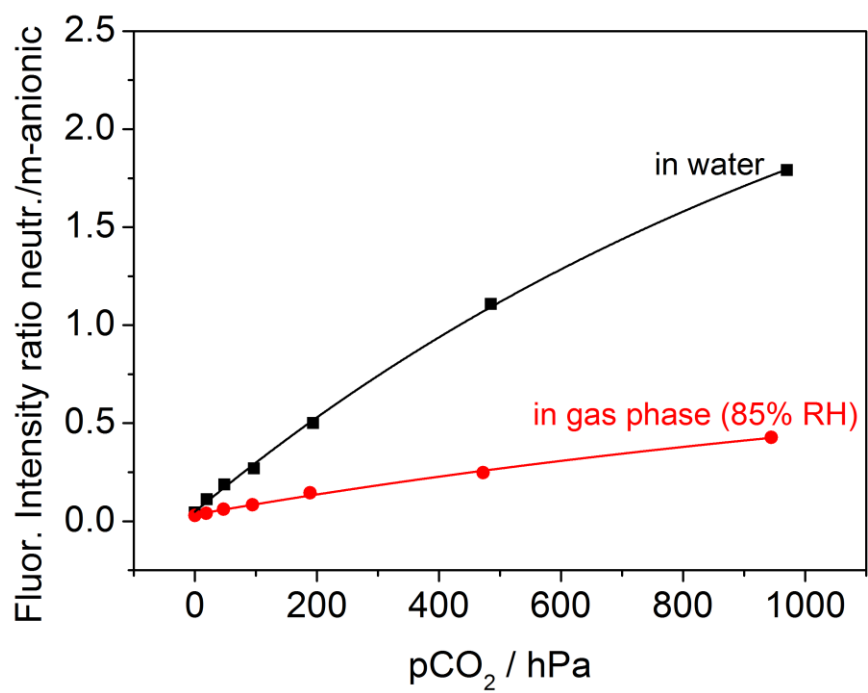

Figure S14. Corresponding calibration curves of CO<sub>2</sub>\_3 sensor foil calibrated in water and in gas phase at 85% relative humidity.

## NMR Spectra

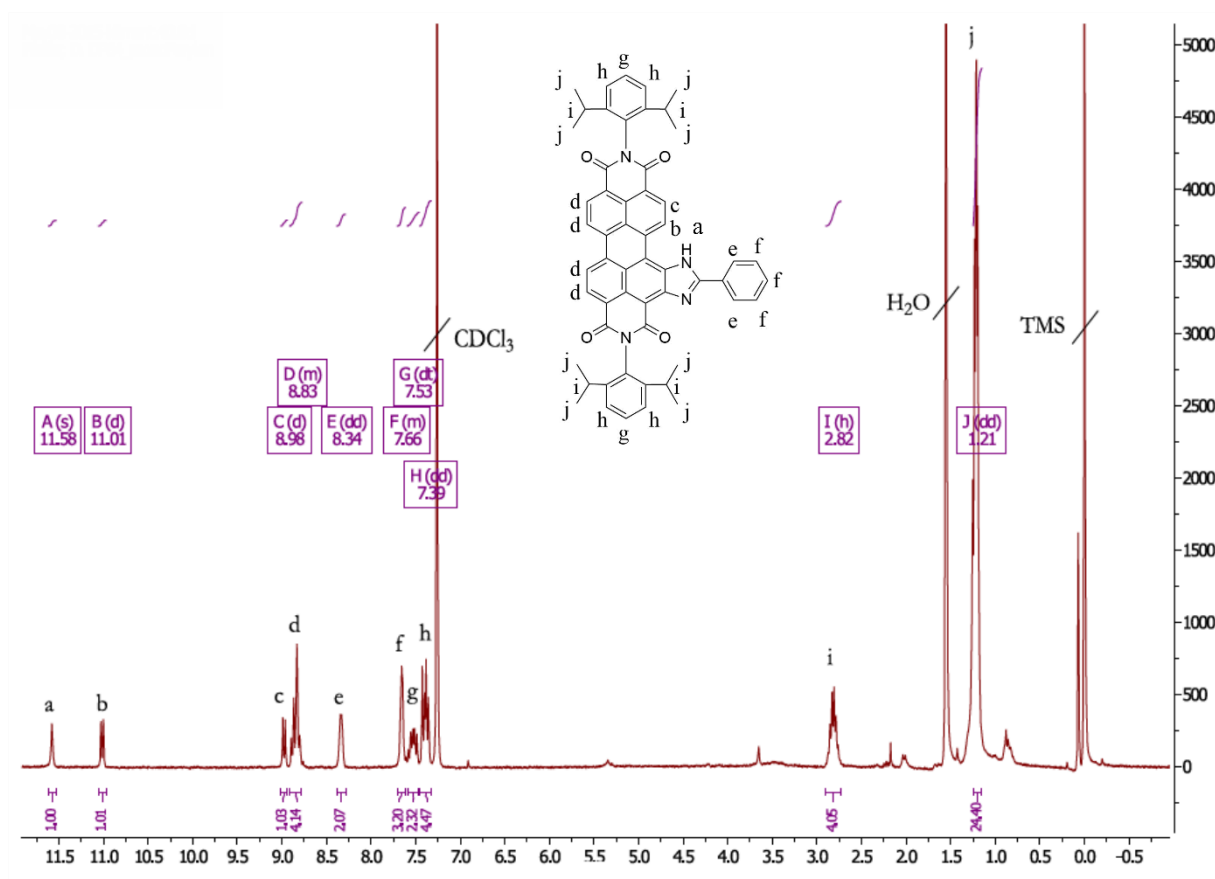

Figure S15.  $^1\text{H}$  NMR ( $\text{CDCl}_3$ , 300 MHz) of **2a**.

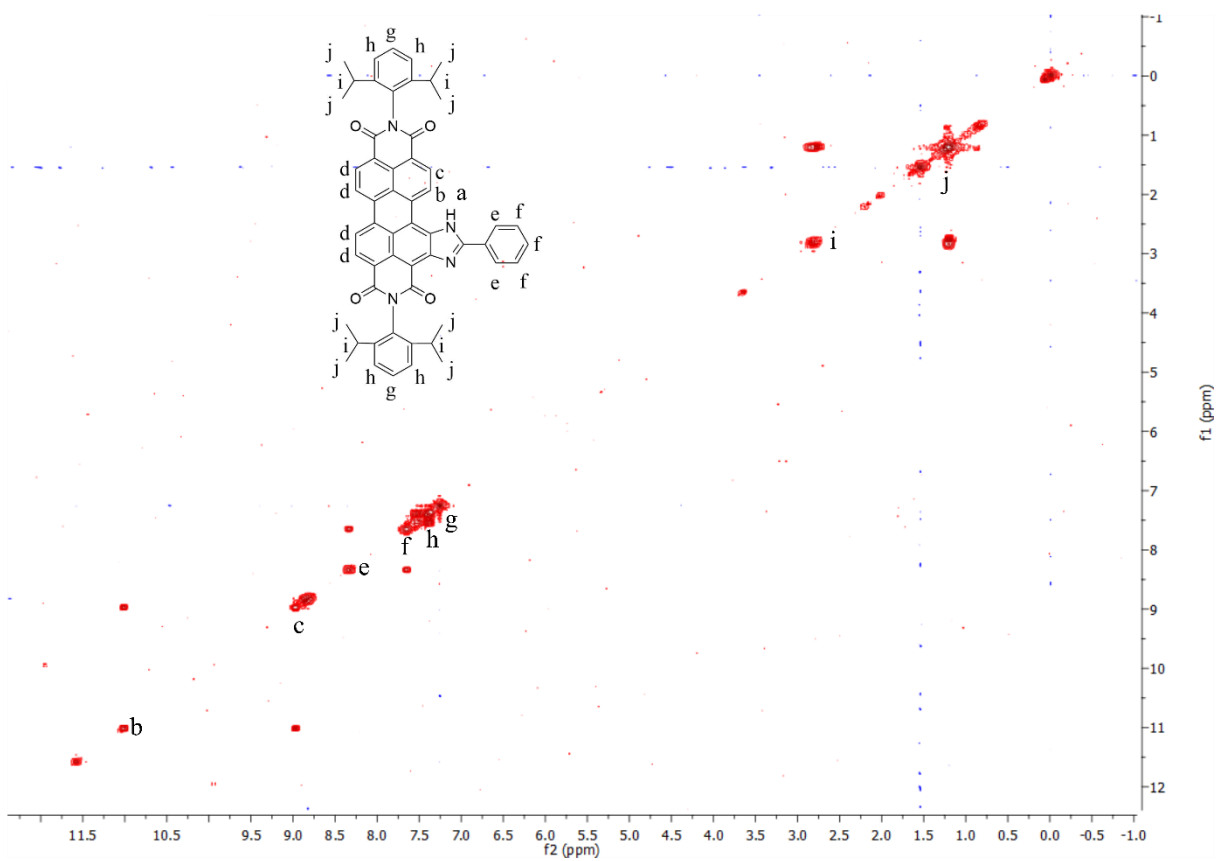

Figure S16. Cosy NMR ( $\text{CDCl}_3$ , 300 MHz) of **2a**.

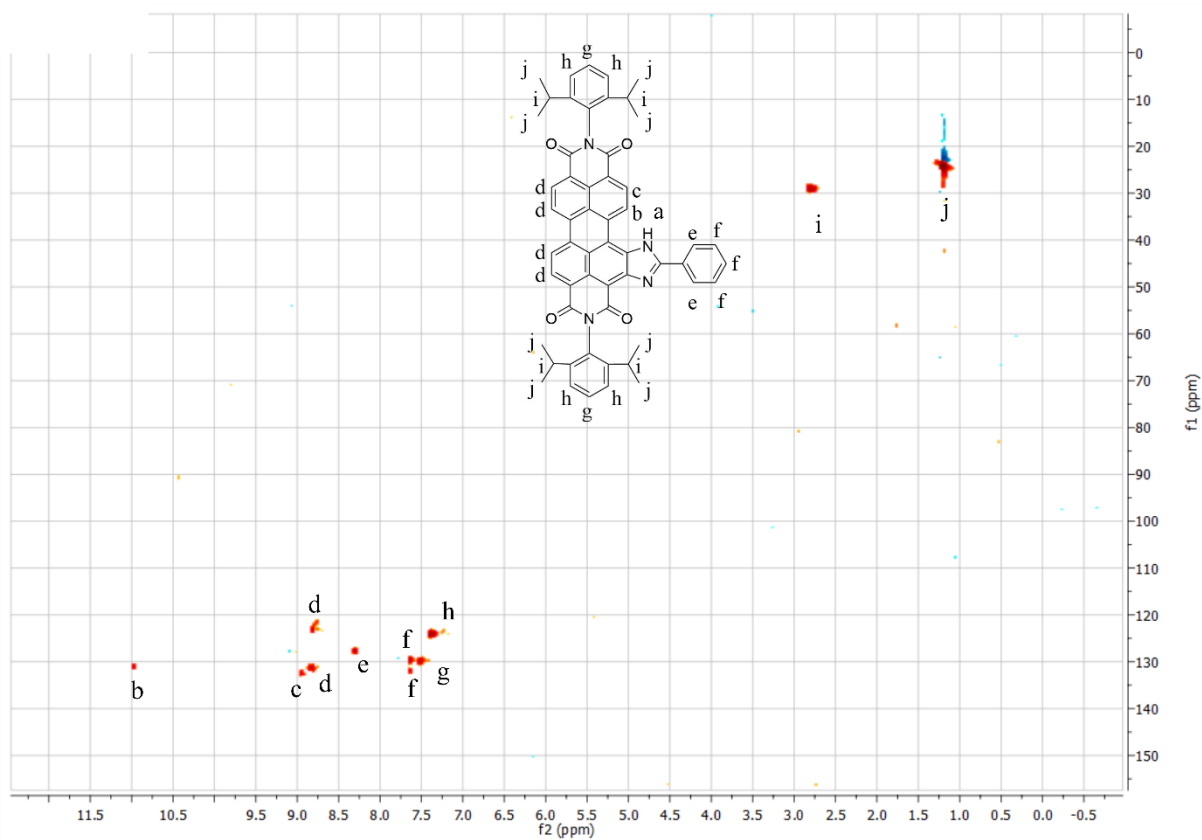

Figure S17. HSQC NMR (CDCl<sub>3</sub>, 500 MHz, 126 MHz) of **2a**.

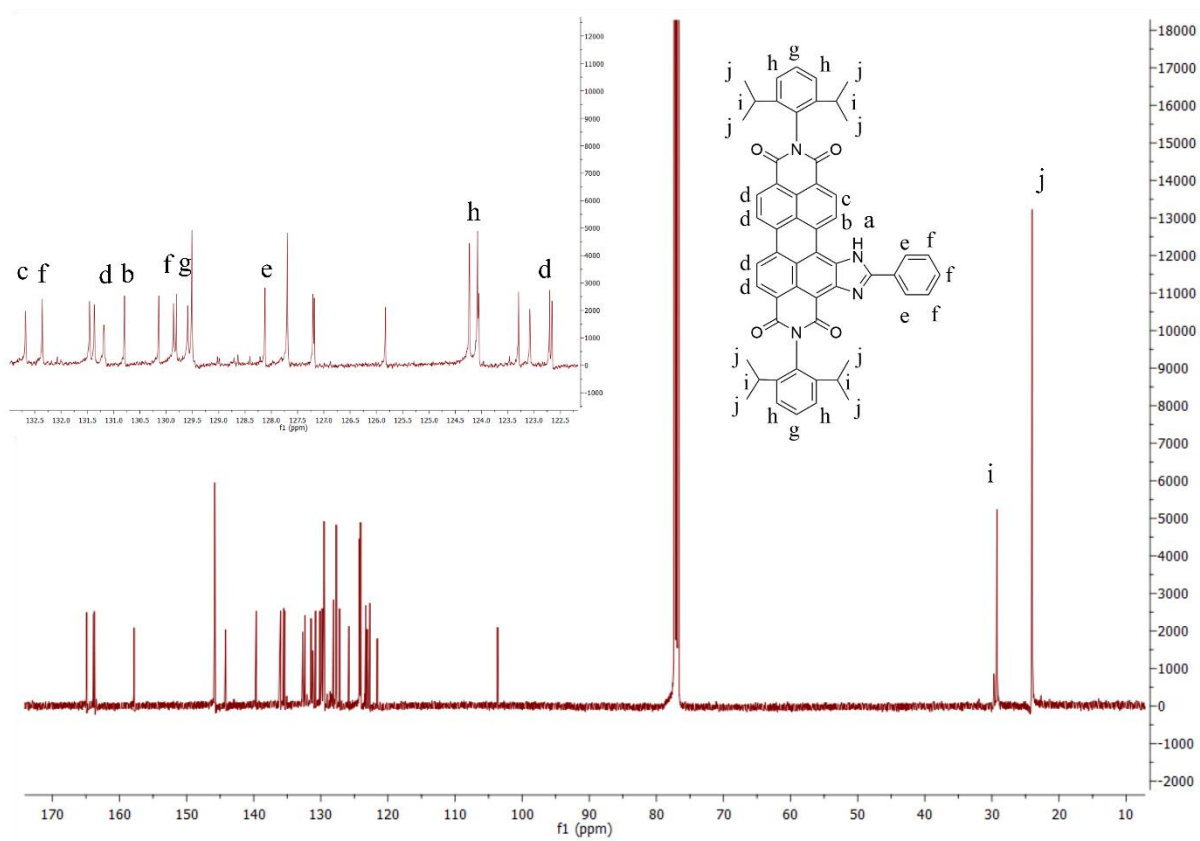

Figure S18. <sup>13</sup>C NMR (CDCl<sub>3</sub>, 126 MHz) of **2a**.

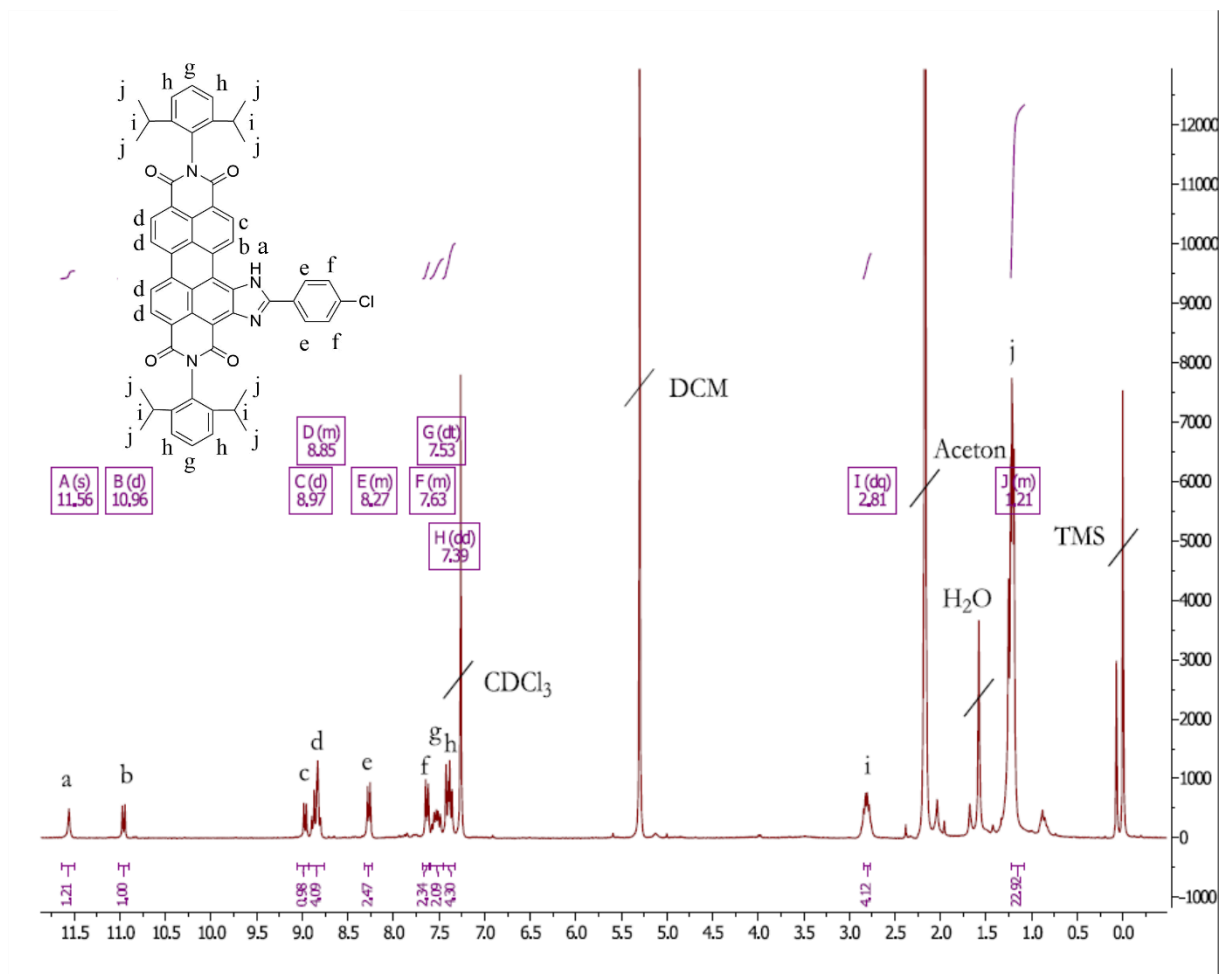

Figure S19.  $^1\text{H}$  NMR (CDCl<sub>3</sub>, 300 MHz) of **2b**.

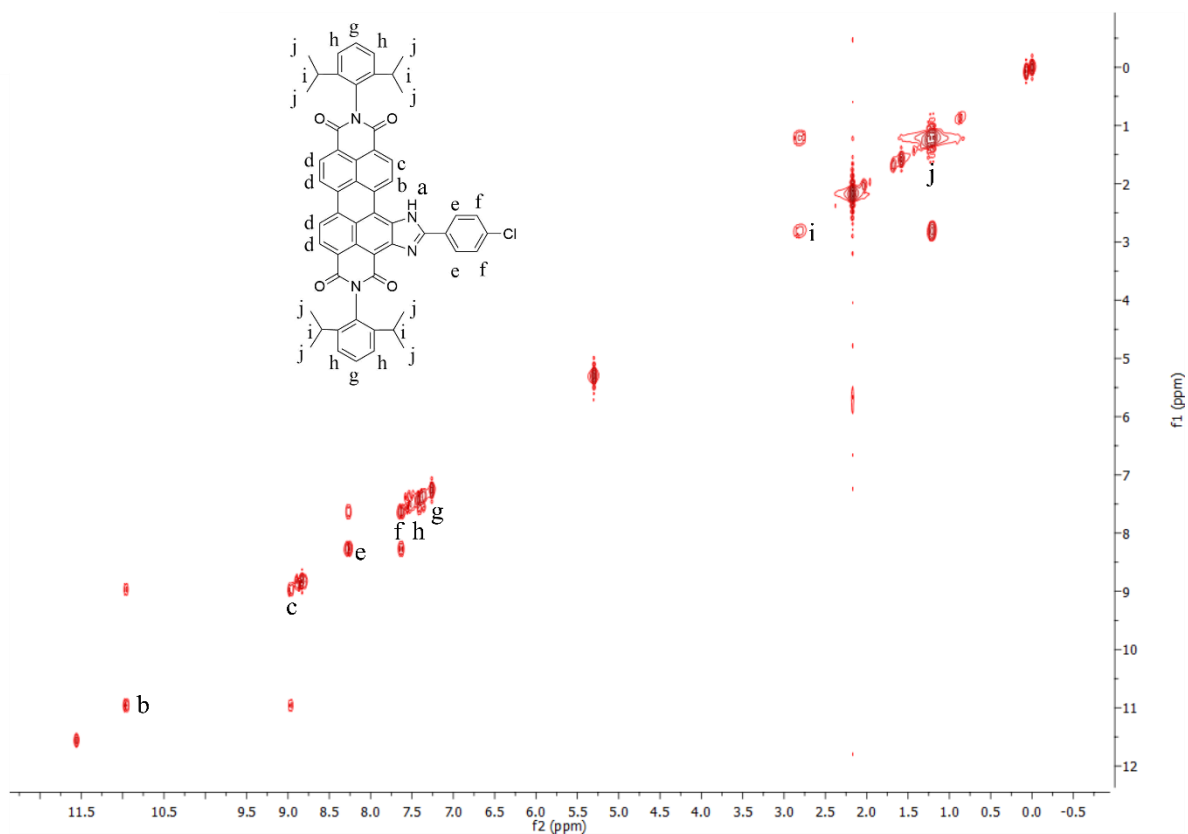

Figure S20. Cosy NMR (CDCl<sub>3</sub>, 300 MHz) of **2b**.

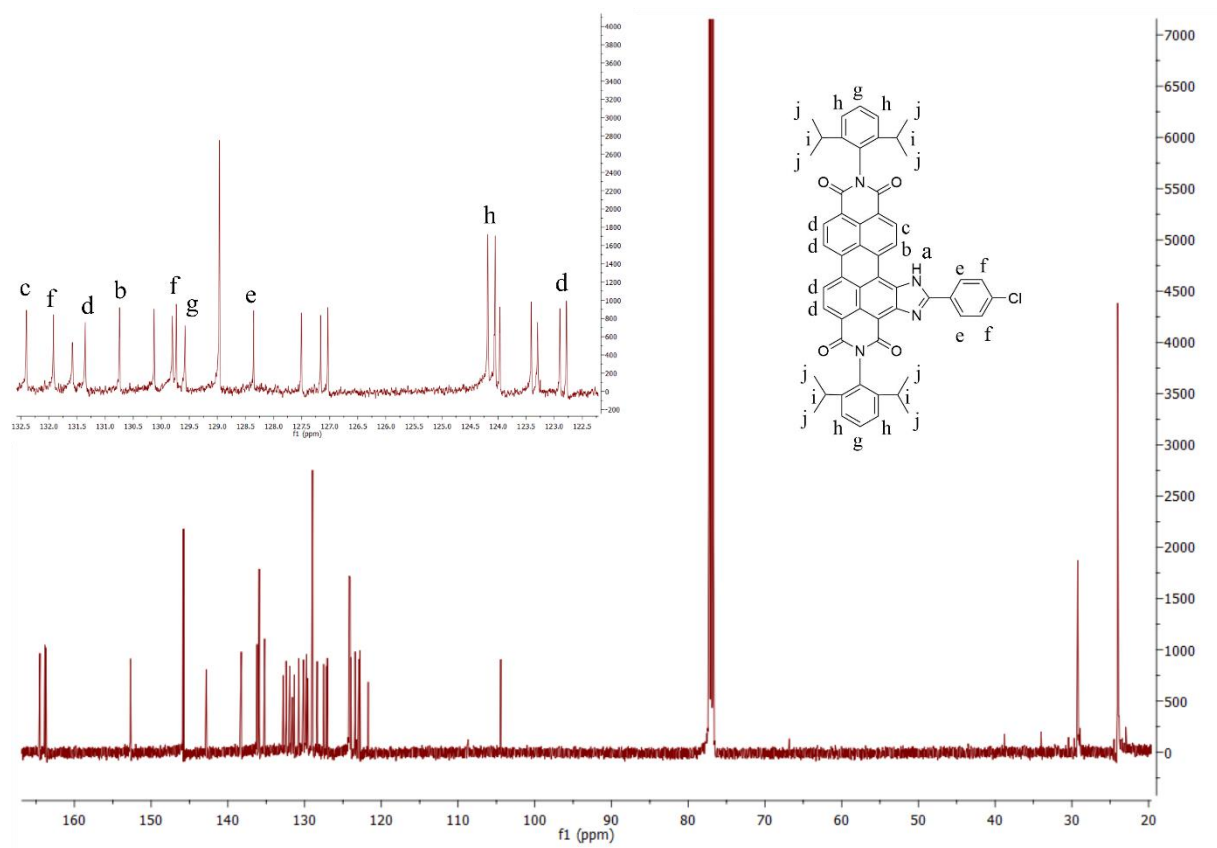

Figure S21.  $^{13}\text{C}$  NMR ( $\text{CDCl}_3$ , 126 MHz) of **2b**.



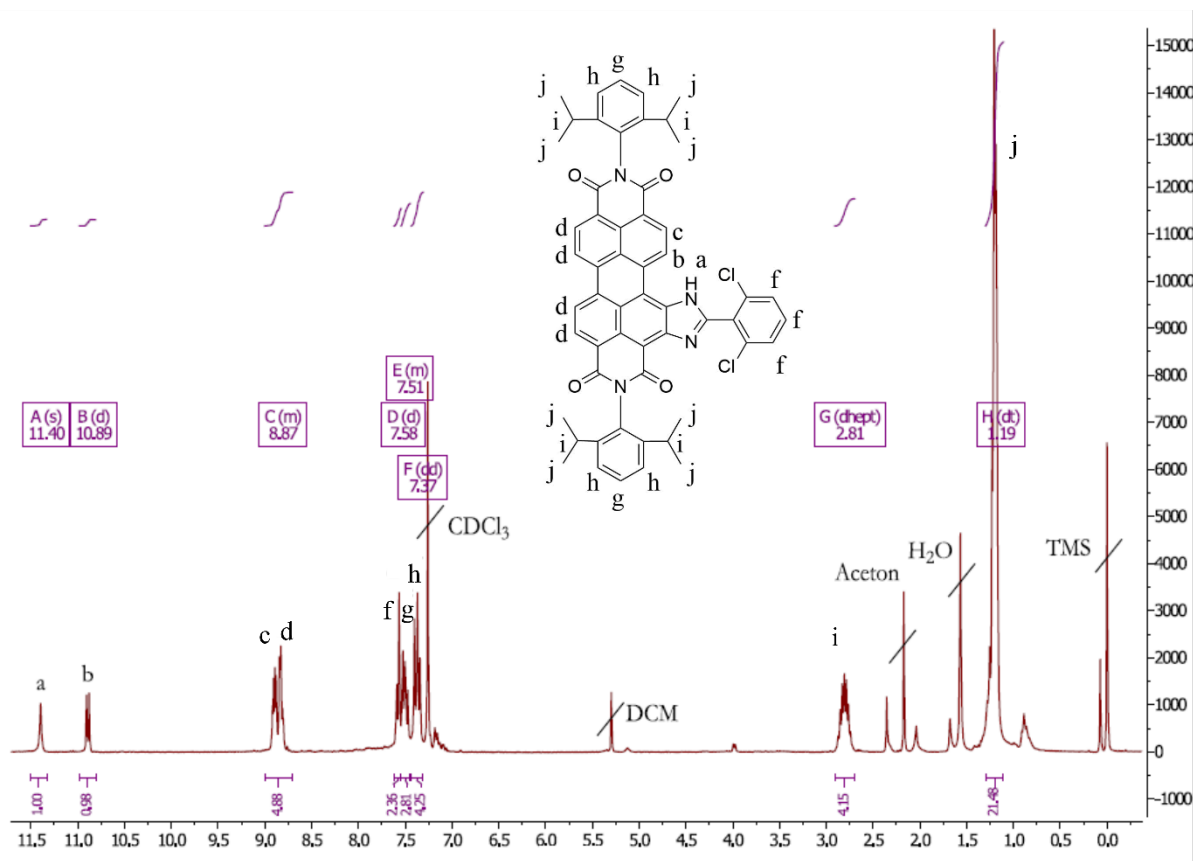

Figure S22.  $^1\text{H}$  NMR ( $\text{CDCl}_3$ , 300 MHz) of **2c**.

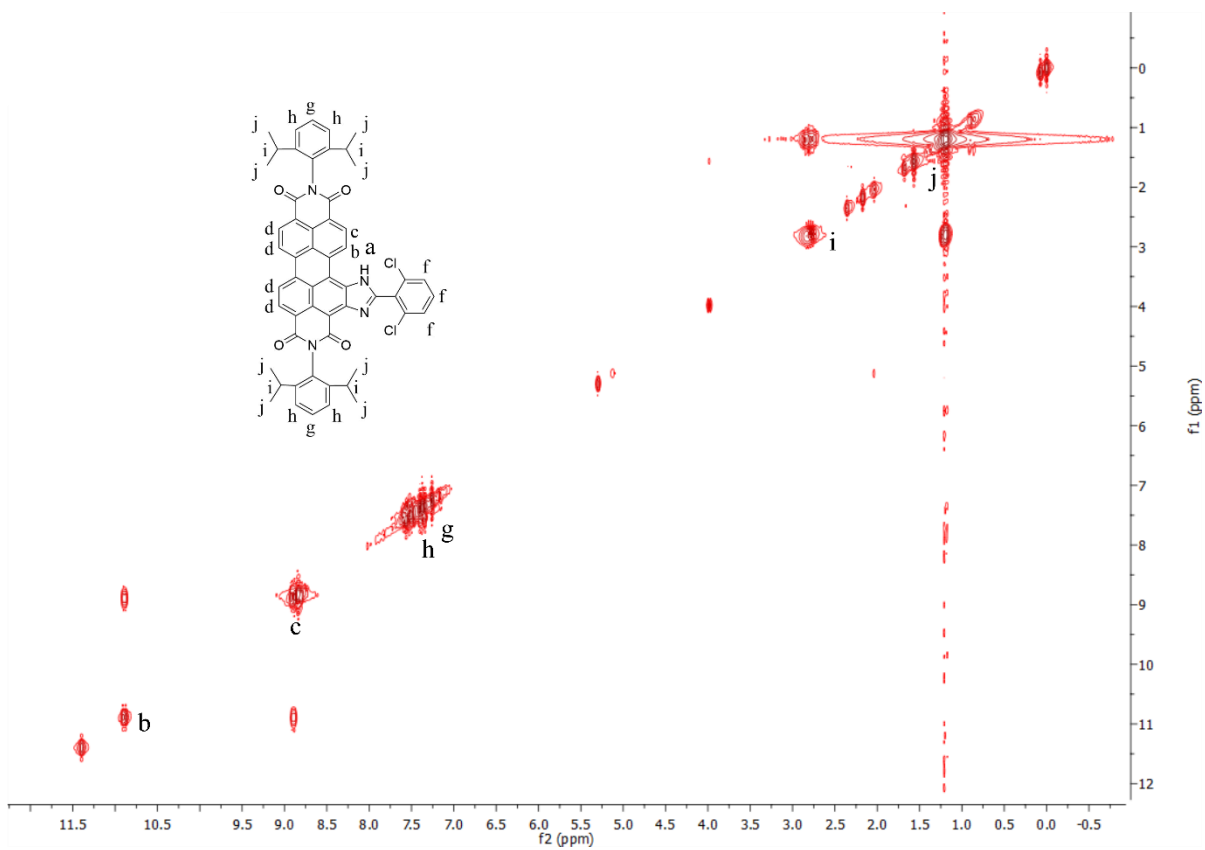

Figure S23. Cosy NMR ( $\text{CDCl}_3$ , 300 MHz) of **2c**.

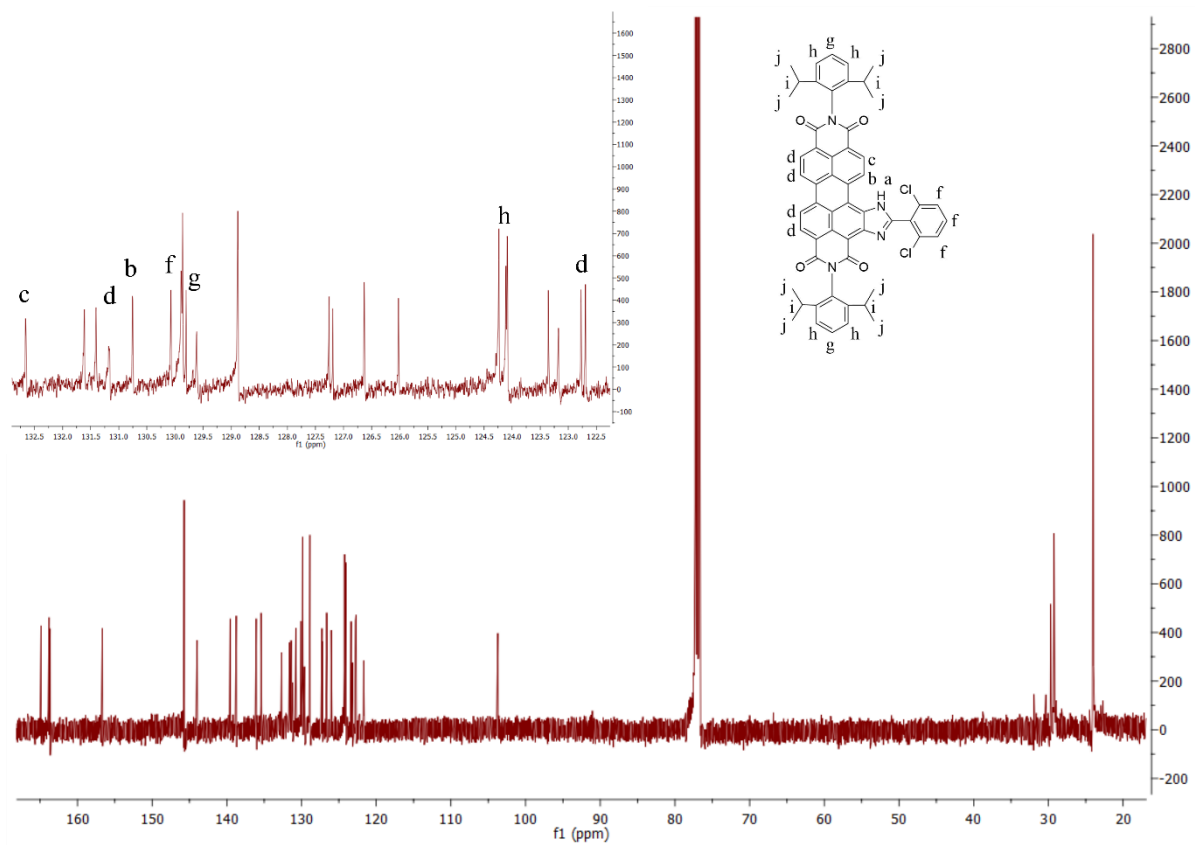

Figure S24.  $^{13}\text{C}$  NMR ( $\text{CDCl}_3$ , 126 MHz) of **2c**.

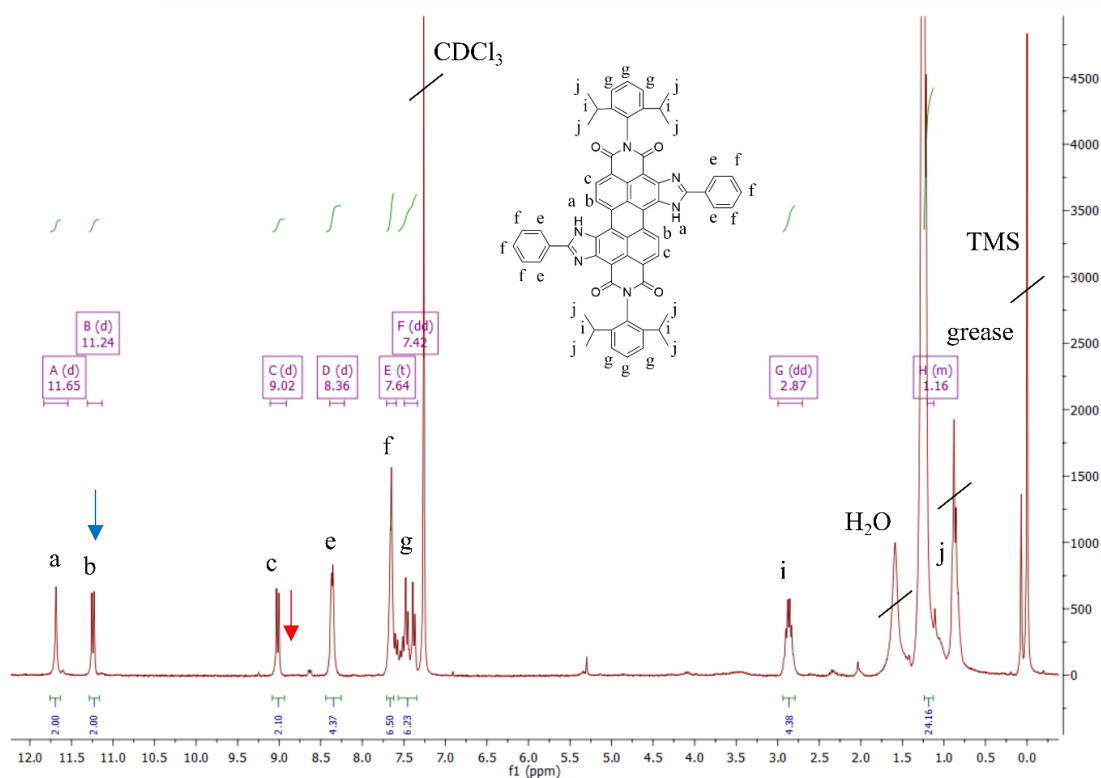

Figure S25.  $^1\text{H}$  NMR ( $\text{CDCl}_3$ , 300 MHz) of **3a**. The red arrow indicates the signals at around 8.85 ppm which would be expected for the H-atoms located on the opposite side of the perylene for the regioisomer bearing both phenyl-imidazol groups only on one side of the perylene (compare to the signals of *d*-protons in  $^1\text{H}$  NMR of **2a**, **2b** and **2c** (Fig. S15, S19, S22)). Additionally, the signal from the protons *b* (blue arrow) is located at about 11 ppm (similarly to the protons in **2a**, **2b** and **2c**) which is due to the proximity NH group. The regioisomer would not show protons with such a shift.

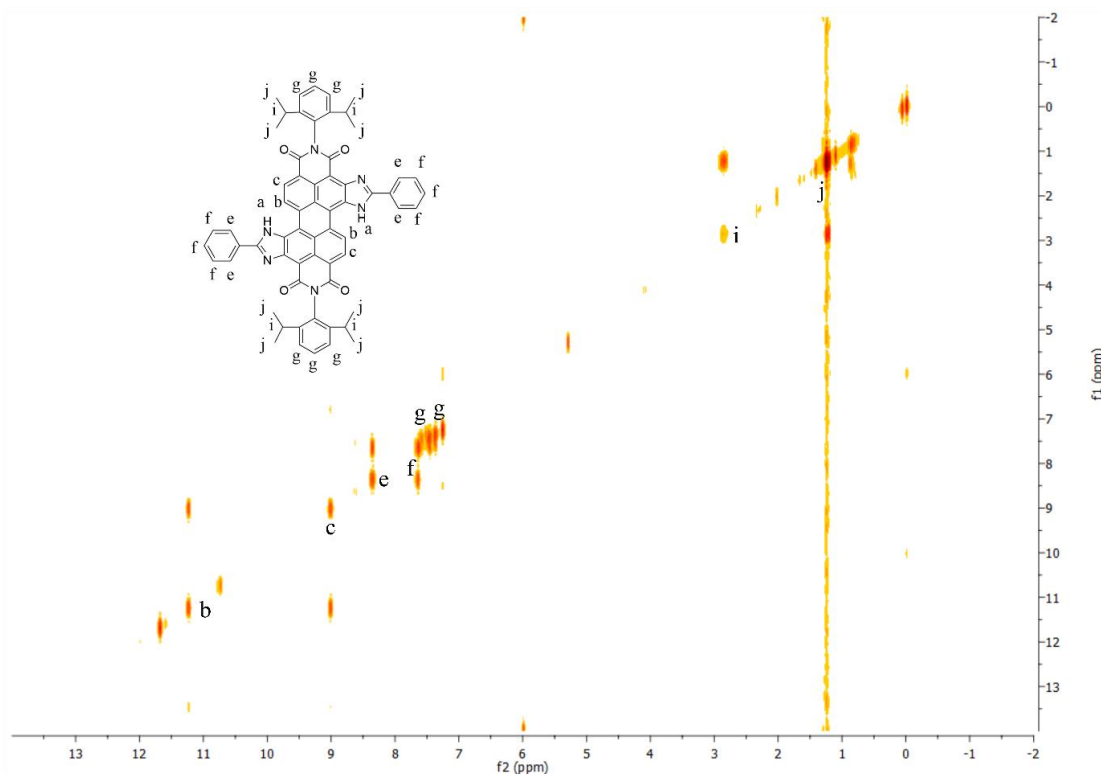

Figure S26. Cosy NMR ( $\text{CDCl}_3$ , 500 MHz) of **3a**.

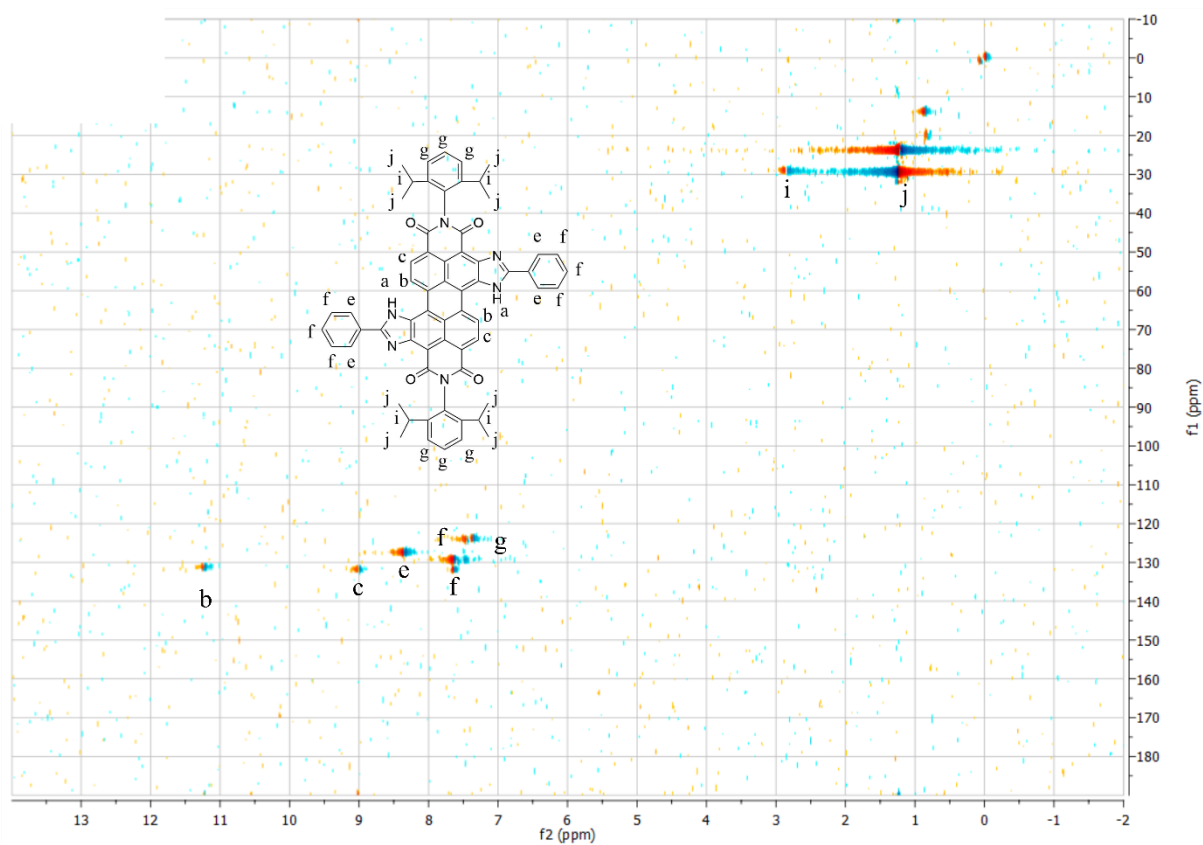

Figure S27. HSQC NMR (CDCl<sub>3</sub>, 500 MHz, 126 MHz) of **3a**.

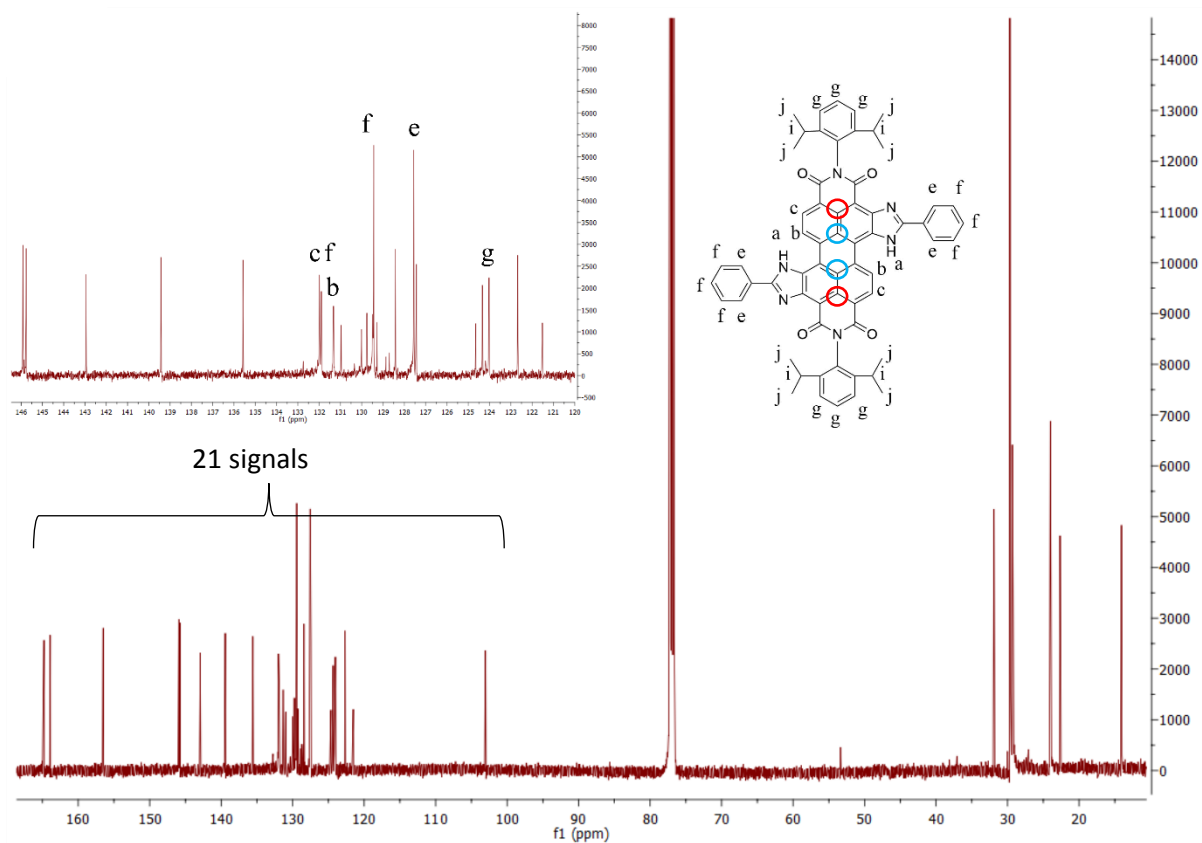

Figure S28. <sup>13</sup>C NMR (CDCl<sub>3</sub>, 126 MHz) of **3a** showing overall 21 signals in the aromatic region.

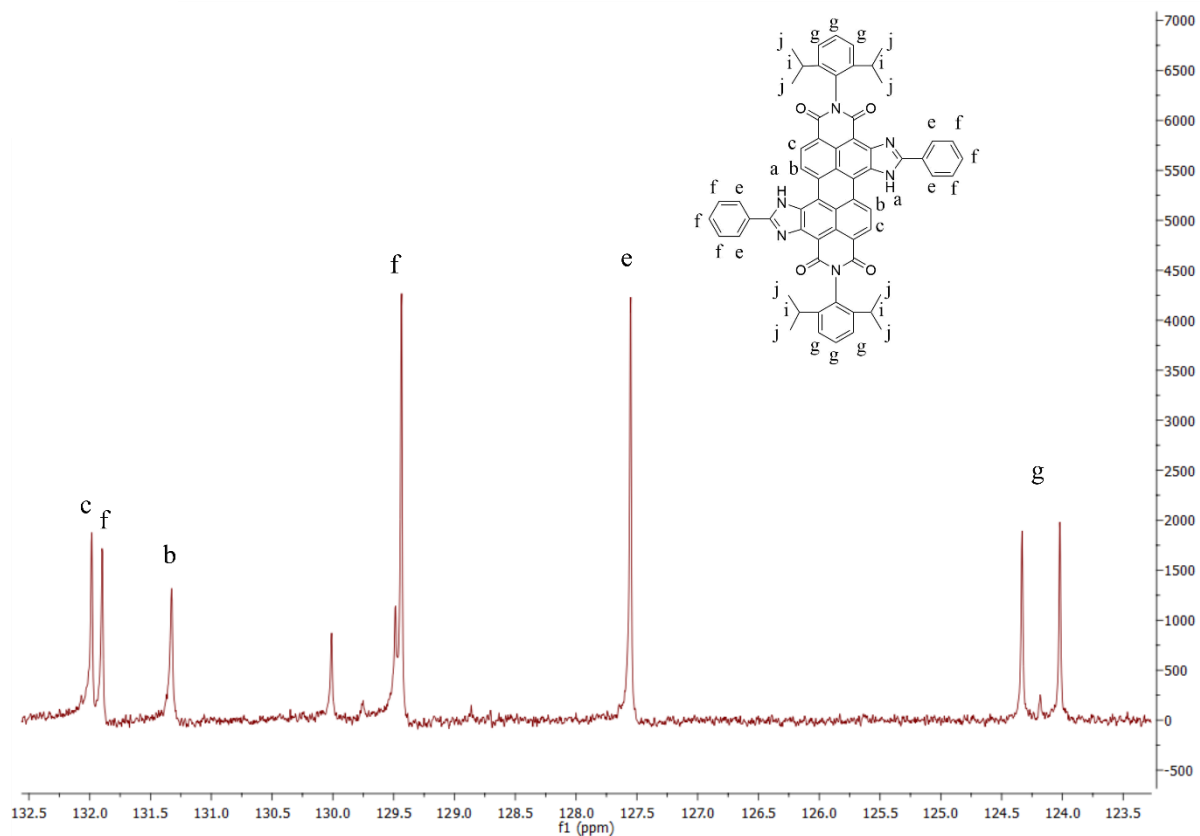

Figure S29.  $^{13}\text{C}$ -DEPT NMR ( $\text{CDCl}_3$ , 126 MHz) of **3a**.

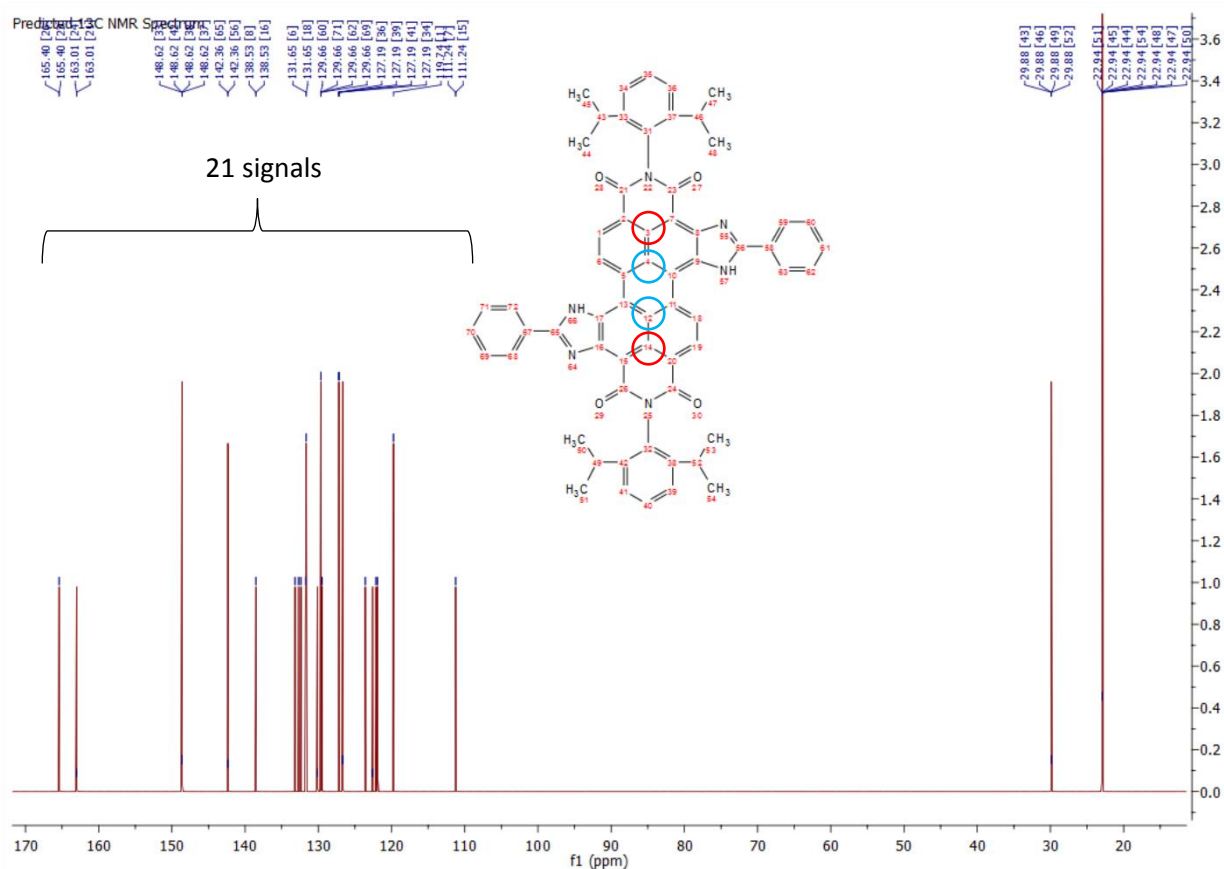

Figure S30.  $^{13}\text{C}$  NMR simulation for symmetric **3a** with 21 signals in the aromatic region. 4 C-atoms in the centre of the perylene system (marked with red and blue circles) deliver only 2 signals due to 2 different surroundings.

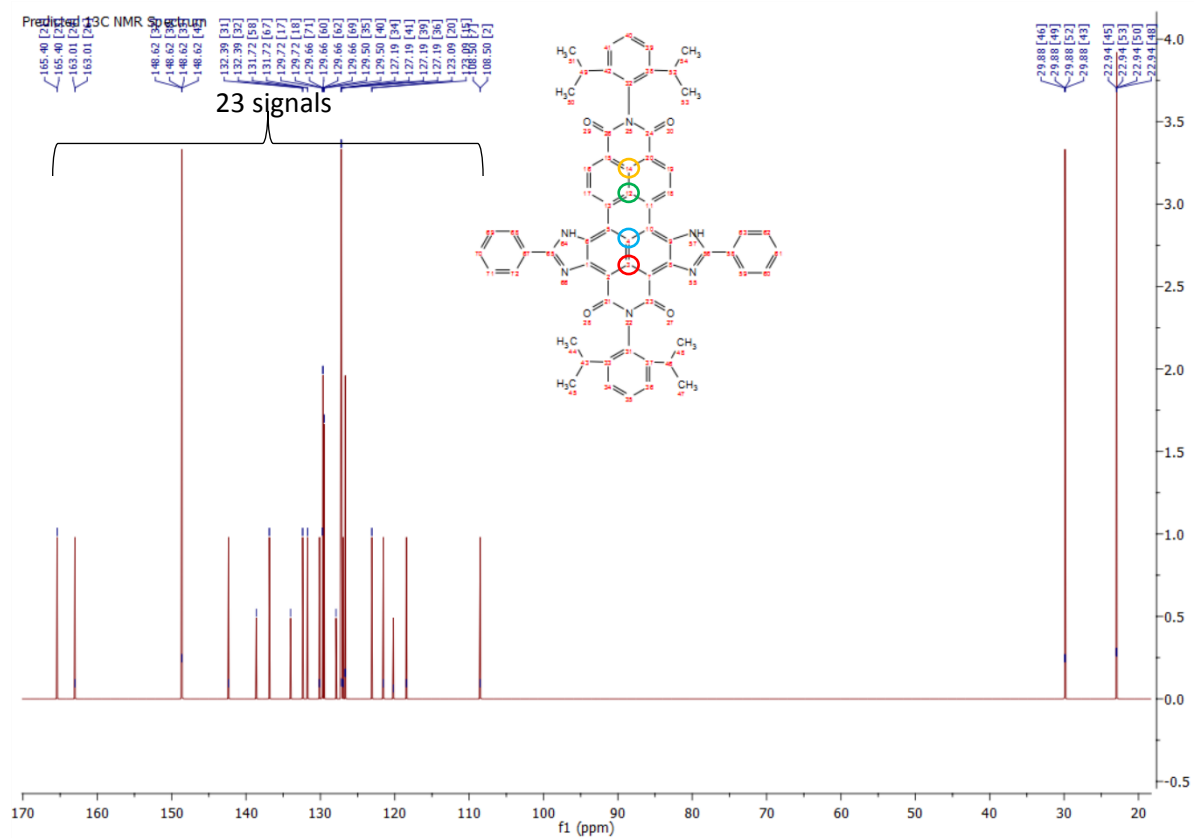

Figure S31.  $^{13}\text{C}$  NMR simulation of **3a** regioisomer with 23 signals in the aromatic region. 4 C-atoms in the centre of the perylene system (marked with red, blue, green and yellow circles) deliver 4 signals due to 4 different surroundings.

# MALDI-TOF-MS

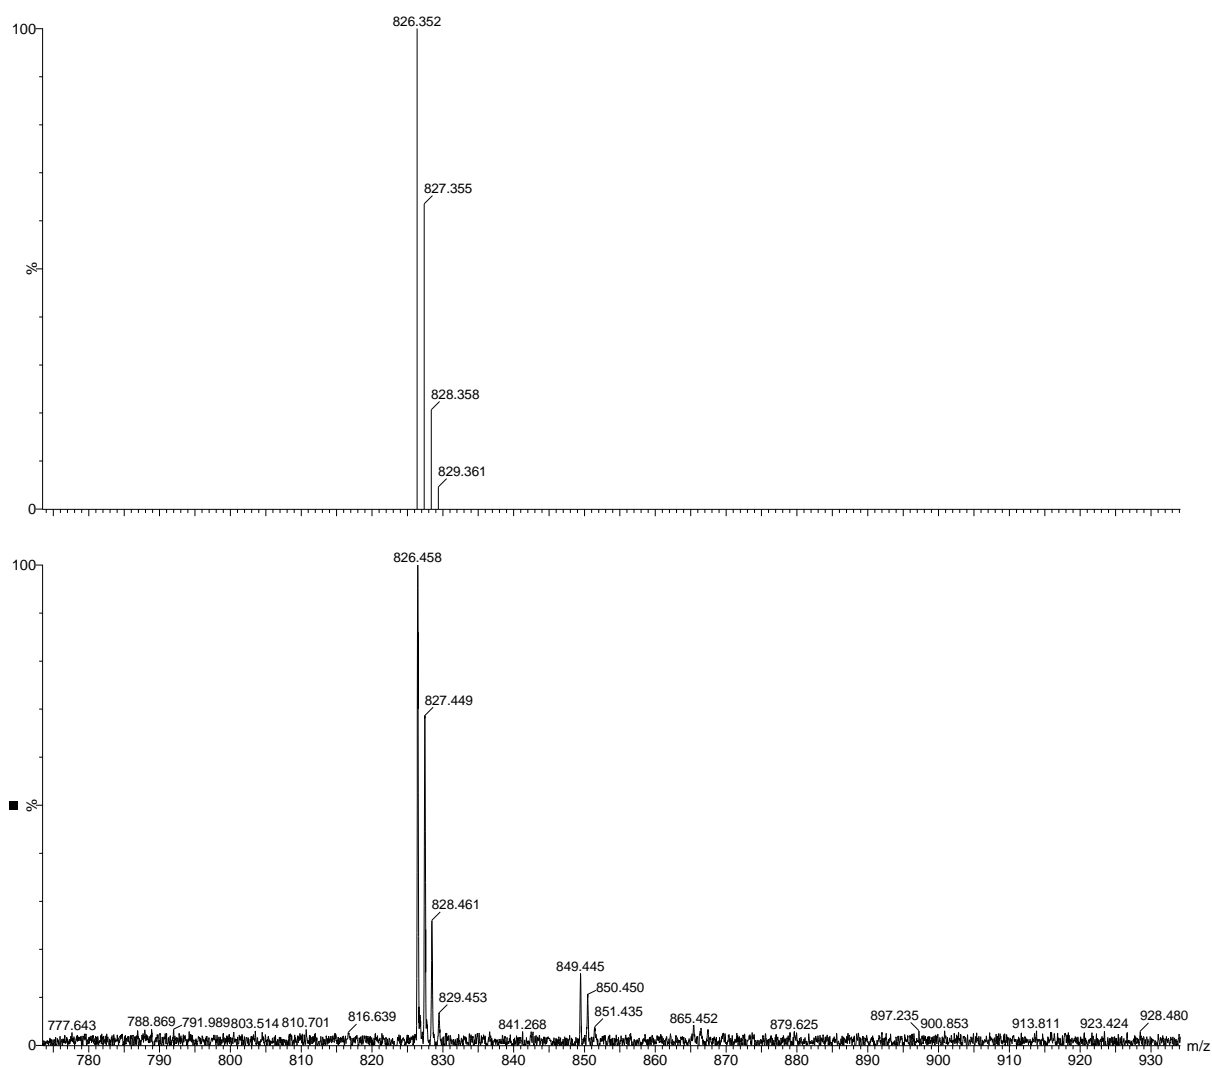

Figure S32. Theoretical isotope pattern and experimental MALDI-TOF-Mass spectrum of **2a**.

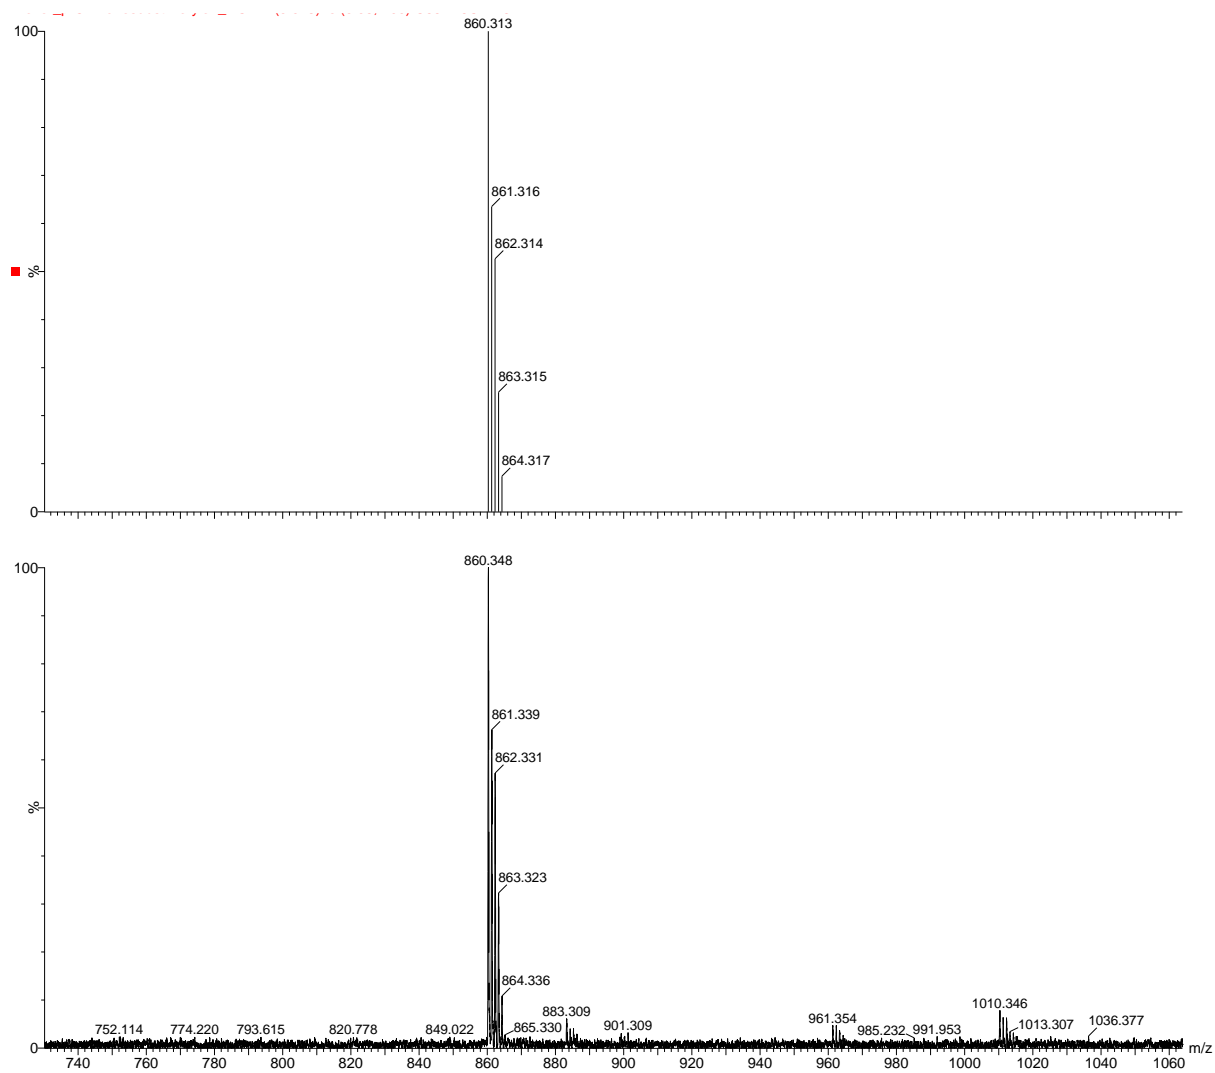

Figure S33. Theoretical isotope pattern and experimental MALDI-TOF-Mass spectrum of **2b**.



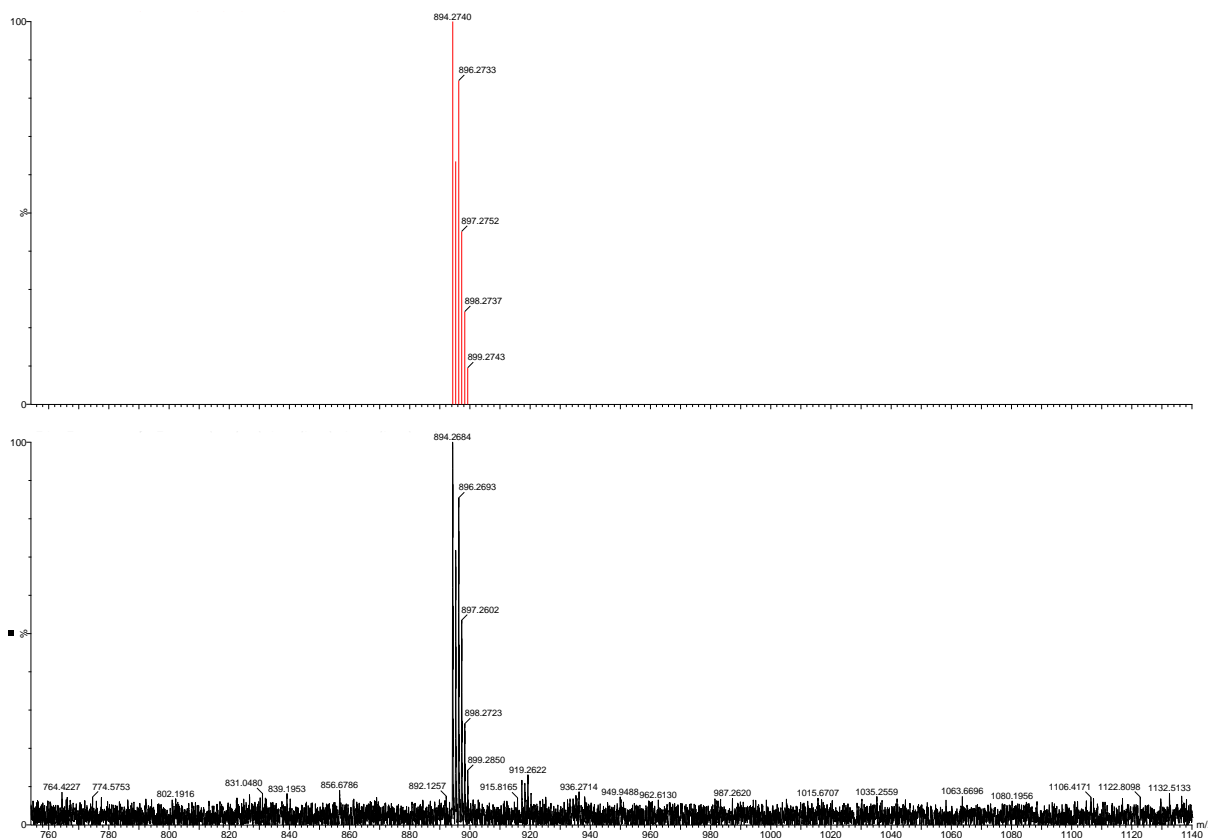

Figure S34. Theoretical isotope pattern and experimental MALDI-TOF-Mass spectrum of **2c**.

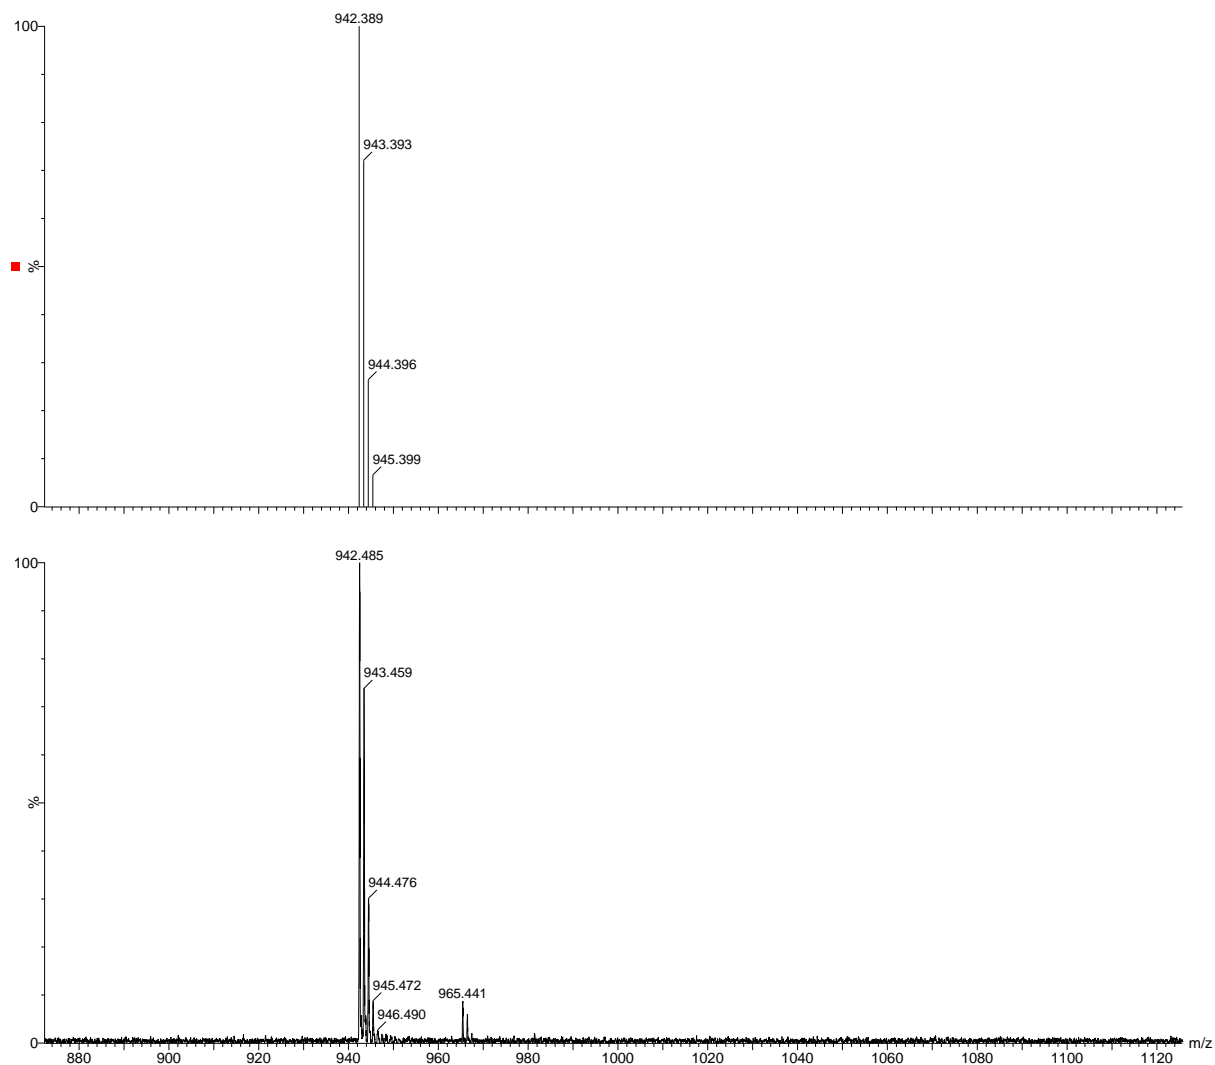

Figure S35. Theoretical isotope pattern and experimental MALDI-TOF-Mass spectrum of **3a**.
